# Supplementary material
Source: Springer Nature journal article supplement (https://www.springerprofessional.de/resource/supplementary/40095_2011_8_MOESM9_ESM.pdf/11899688)

| Quantity            | Value |
|---------------------|-------|
| String size         | 20    |
| Strings in parallel | 25    |
| Batteries           | 500   |
| Bus voltage (V)     | 120   |

| Quantity                | Value   | Units  |
|-------------------------|---------|--------|
| Nominal capacity        | 675     | kWh    |
| Usable nominal capacity | 473     | kWh    |
| Autonomy                | 0.967   | hr     |
| Lifetime throughput     | 422,500 | kWh    |
| Battery wear cost       | 0.270   | \$/kWh |
| Average energy cost     | 0.000   | \$/kWh |

| Quantity          | Value  | Units  |
|-------------------|--------|--------|
| Energy in         | 73,239 | kWh/yr |
| Energy out        | 62,302 | kWh/yr |
| Storage depletion | 52     | kWh/yr |
| Losses            | 10,885 | kWh/yr |
| Annual throughput | 67,576 | kWh/yr |
| Expected life     | 6.25   | yr     |

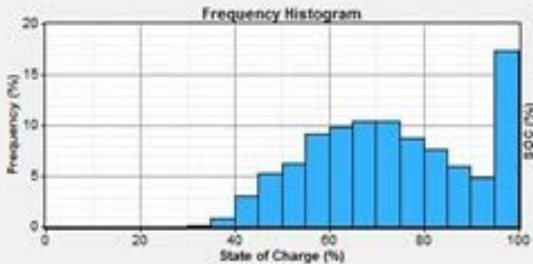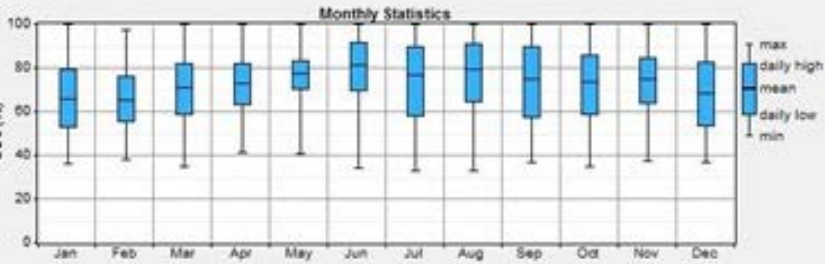

Supplement: MOESM9 [file 11899688]
